# Supplementary material for: Exploring the intra-4f and the bright white light upconversion emissions of Gd2O3:Yb3+,Er3+-based materials for thermometry
Source: Royal Society of Chemistry journal article supplement (doi:10.1039/d3nr01764h), 2023-01-01
Supplement: d3nr01764h1.pdf [file d3nr01764h1.pdf]

## SUPPORTING INFORMATION

# Exploring the intra-4f and the bright white light upconversion emissions of $\text{Gd}_2\text{O}_3\text{:Yb}^{3+}$ , $\text{Er}^{3+}$ based materials for thermometry

Talita J. S. Ramos<sup>1,2</sup>, Ricardo L. Longo<sup>1\*</sup>, Carlos D. S. Brites<sup>2</sup>, Rute A. S. Ferreira<sup>2</sup>,  
Oscar L. Malta<sup>1</sup>, and Luís D. Carlos<sup>2\*</sup>

<sup>1</sup> Departamento de Química Fundamental. Universidade Federal de Pernambuco,  
50740-540, Recife, PE, Brazil.

<sup>2</sup>Phantom-g, CICECO – Aveiro Institute of Materials, Department of Physics,  
University of Aveiro, 3810-193 Aveiro, Portugal.

\*E-mail: ricardo.longo@ufpe.br; lcarlos@ua.pt

## Contents

|      |                                                       |    |
|------|-------------------------------------------------------|----|
| 1.   | Structural characterization .....                     | 2  |
| 2.   | Energy gap determination .....                        | 4  |
| 3.   | Thermometric analysis .....                           | 5  |
| 4.   | White-light emission .....                            | 9  |
| 4.1. | Excitation wavelength .....                           | 9  |
| 4.2. | Pump power dependence and powder versus pellets ..... | 10 |
| 4.3. | Pressure dependence .....                             | 11 |
| 4.4. | Temperature determination from Planck's Law .....     | 12 |
| 5.   | Estimating the thermal conductivity .....             | 15 |
| 6.   | Experimental procedure to temporal analysis .....     | 16 |
| 7.   | References .....                                      | 17 |

## 1. Structural characterization

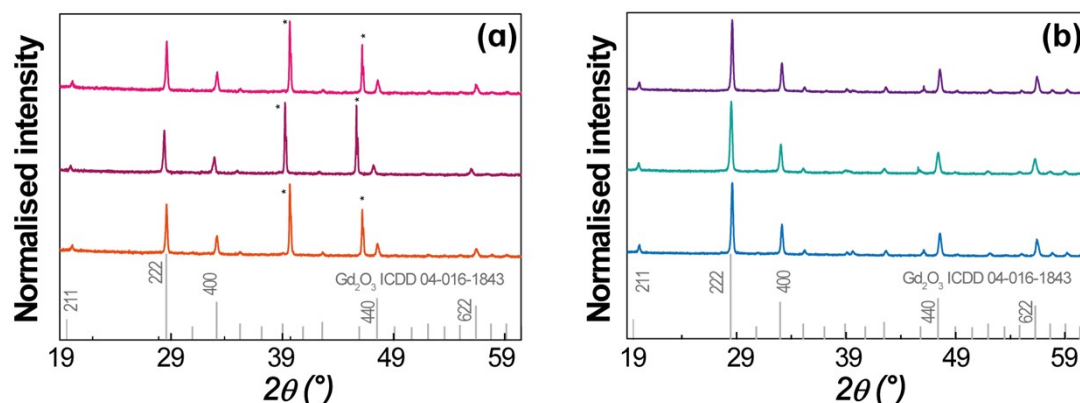

**Fig. S1.** X-ray powder diffraction patterns of **1** under (a) heating and (b) heating/vacuum cycles. In (a), the lines in orange, violet, and pink correspond to ambient temperature, 1273 K, and ambient temperature after the heating cycle. In (b), the lines in blue, dark-cyan, and violet corresponds to ambient conditions, 1273 K in vacuum at 10<sup>-5</sup> bar, and ambient conditions after the heating/pressure cycle. The reflections of cubic Gd<sub>2</sub>O<sub>3</sub> are also depicted. The asterisks denote the Pt wire attached to the sample holder used to raise the temperature.

Representative scanning transmission electron microscope (STEM) images of **1** and **2** are shown in **Fig. S2a,b**. In **1** the average size of the agglomerates is smaller, as expected due to the nanosized nature of the system and in accord with the crystallite size estimated by XRD (Scherrer equation). EDS analysis of the two samples reports peaks attributed to Gd, Yb, and Er elements, as expected. The lower amount of Yb and Er and the spectral overlap with Al peaks precludes an accurate quantification of their relative amounts.

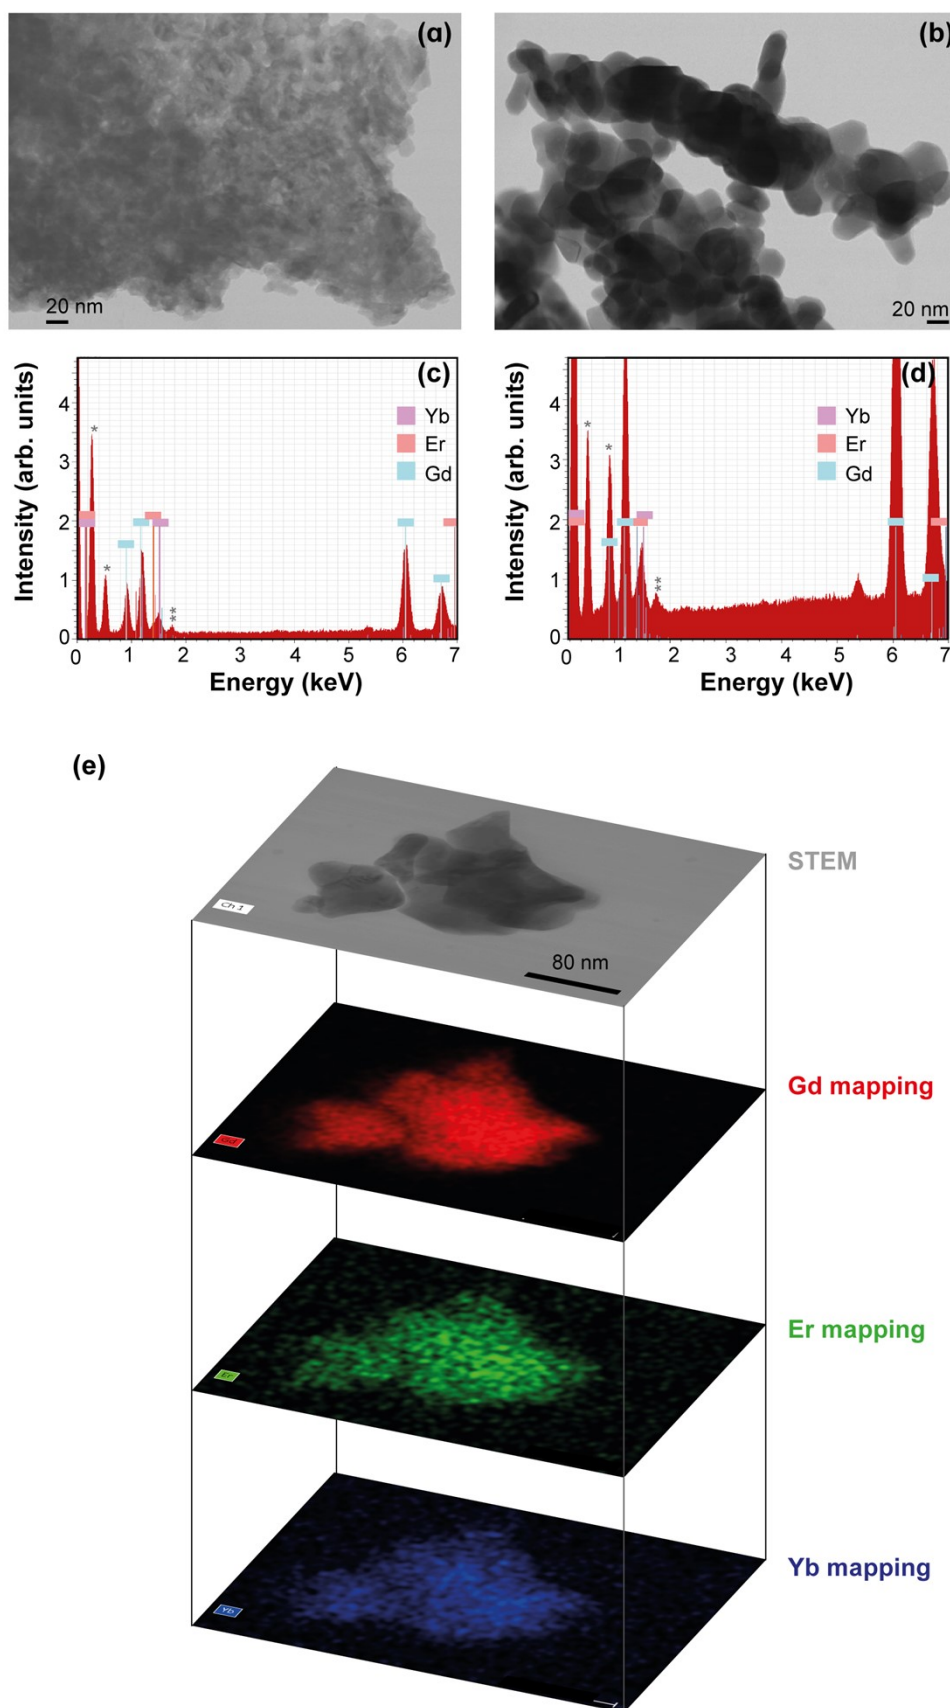

**Figure S2.** STEM images of (a) 1 and (b) 2 and corresponding EDS profiles, (c) and (d), respectively. The peaks marked with asterisks denote the Cu (\*) and Al (\*\*) elements arising from the grids and the sample holder, respectively. (e) Illustrative STEM image of 2 and corresponding Gd, Er, and Yb elemental distributions.

**Table S1.** Values of the slopes  $n$  resulting from the best fit (in a log-log plot) to  $\log(I_{UC}) \propto n \times \log(P_D)$ , where  $I_{UC}$  is the integrated intensity of the corresponding transition and  $P_D$  the laser power density ( $\text{W} \cdot \text{cm}^{-2}$ ), for **1** and **2**. The values of pressure ( $p$ , bar) and temperature ( $T$ , K) at which the emission spectra were recorded are indicated.

| Sample   | ${}^4\text{H}_{11/2} \rightarrow {}^4\text{I}_{15/2}$ | ${}^4\text{S}_{3/2} \rightarrow {}^4\text{I}_{15/2}$ | ${}^4\text{F}_{9/2} \rightarrow {}^4\text{I}_{15/2}$ | $p$ (bar)          | $T$ (K) |
|----------|-------------------------------------------------------|------------------------------------------------------|------------------------------------------------------|--------------------|---------|
| <b>1</b> | $0.9 \pm 0.1$                                         | $0.5 \pm 0.1$                                        | $0.7 \pm 0.1$                                        | ambient            | 297     |
| <b>2</b> | $1.1 \pm 0.1$                                         | $0.8 \pm 0.1$                                        | $0.8 \pm 0.1$                                        |                    |         |
|          | $1.5 \pm 0.3$                                         | $1.9 \pm 0.2$                                        | $1.7 \pm 0.3$                                        |                    |         |
| <b>1</b> | $1.6 \pm 0.1$                                         | $0.9 \pm 0.1$                                        | $0.7 \pm 0.1$                                        | $7 \times 10^{-5}$ | 314     |
|          | $1.2 \pm 0.2$                                         | $0.5 \pm 0.1$                                        | $0.3 \pm 0.1$                                        |                    | 309     |
|          | $1.4 \pm 0.2$                                         | $0.7 \pm 0.1$                                        | $0.5 \pm 0.1$                                        | $2 \times 10^{-5}$ | 306     |

## 2. Energy gap determination

The energy gap ( $\Delta E$ ) between the  ${}^2\text{H}_{11/2}$  and  ${}^4\text{S}_{3/2}$  levels was determined based on the barycenter of the  ${}^2\text{H}_{11/2} \rightarrow {}^4\text{I}_{15/2}$  and  ${}^4\text{S}_{3/2} \rightarrow {}^4\text{I}_{15/2}$  transitions in the emission spectrum of the samples when irradiated upon 980 nm at  $16.4 \text{ W} \cdot \text{cm}^{-2}$ . The region corresponding to the  ${}^2\text{H}_{11/2} \rightarrow {}^4\text{I}_{15/2}$  ( $I_H$ ) and  ${}^4\text{S}_{3/2} \rightarrow {}^4\text{I}_{15/2}$  ( $I_S$ ) transitions were fitted using Gaussian functions by peak analyzer routine of the OriginLab© software (Figure S3). The barycenters of the  ${}^2\text{H}_{11/2}$  and  ${}^4\text{S}_{3/2}$  levels are calculated by weighted the arithmetic mean using the fitted area,  $A_i$ , and peak energy,  $v_i$ , of each,  $i$ , Gaussian function, Eq. S1. The energy gap ( $\Delta E$ ) results from the difference between the barycenters of the two transitions:

$$E_{H,S} = \frac{v_1 A_1 + \dots + v_n A_n}{A_1 + \dots + A_n} \quad (\text{S1})$$

The corresponding error ( $\delta \Delta E$ ) was determined by:

$$\delta \Delta E = \sqrt{\delta E_H^2 + \delta E_S^2} \quad (\text{S2})$$

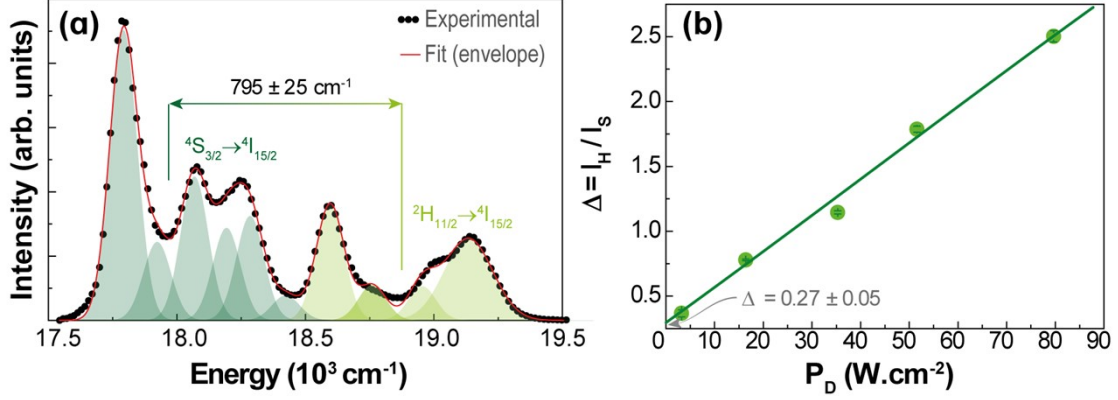

**Figure S3. (a)** Spectral Gaussian deconvolution of the emission spectrum of **1** measured at 297 K and 16.4 W·cm<sup>-2</sup>. The black dots and the red line represent the experimental data and the fit envelope of the spectrum, respectively. The shadowed areas correspond to the Gaussian functions assigned to the <sup>2</sup>H<sub>11/2</sub>→<sup>4</sup>I<sub>15/2</sub> (light green) and <sup>4</sup>S<sub>3/2</sub>→<sup>4</sup>I<sub>15/2</sub> (dark green) transitions. **(b)** Dependence on the pump power laser density of the thermometric parameter ( $\Delta$ ) for **1** (in pellet, at ambient conditions). The error bar represents the uncertainty in  $\Delta$ . The line represents the fit to the experimental data using a straight line ( $r^2 > 0.995$ ). In the limit of the lowest  $P_D$  value, the sample temperature ( $T_0 = 297.1$  K) corresponds to the room temperature, *i.e.*, to the absence of laser-induced heating.

### 3. Thermometric analysis

The uncertainty of the thermometric parameter, Eq. S3 is estimated using the signal-to-noise values, typically calculated dividing the readout fluctuations of the baseline by the maximum intensity value of the <sup>2</sup>H<sub>11/2</sub>→<sup>4</sup>I<sub>15/2</sub> ( $I_H$ ) and <sup>4</sup>S<sub>3/2</sub>→<sup>4</sup>I<sub>15/2</sub> ( $I_S$ ) transitions. The readout fluctuation is estimated by the standard deviation of points in the baseline between 17537 and 17214 cm<sup>-1</sup>:

$$\frac{\delta\Delta}{\Delta} = \sqrt{\left(\frac{\delta I_H}{I_H}\right)^2 + \left(\frac{\delta I_S}{I_S}\right)^2} \quad (\text{S3})$$

#### Relative thermal sensitivity

The relative thermal sensitivity ( $S_r$ ) is defined as:

$$S_r = \frac{1}{\Delta} \left| \frac{\partial \Delta}{\partial T} \right| = \frac{\Delta E}{k_B T^2} \quad (\text{S4})$$

where the last equality is valid for thermometric parameter with the following equation:

$\Delta = A e^{-\Delta E / (k_B T)}$ , with  $A$  being a constant (independent of the temperature),  $\Delta E$  is the energy

gap between the thermally-coupled levels,  $k_B$  is the Boltzmann constant, and  $T$  is the temperature.

The error related to the relative thermal sensitivity ( $\delta S_r$ , Eq. S5) was derived from the errors of the parameters used in the calculation of  $S_r$  (Eq. S4), where  $\delta\Delta E$  is the error in  $\Delta E$  and  $\theta T = 0.1$  K is the uncertainty in the temperature measured by the thermocouple.

$$\delta S_r = S_r \sqrt{\left(\frac{\delta\Delta E}{\Delta E}\right)^2 + \left(-2\frac{\theta T}{T}\right)^2} \quad (\text{S5})$$

The temperature uncertainty is:

$$\delta T = \frac{1}{S_r} \frac{\delta\Delta}{\Delta} \quad (\text{S6})$$

The error in the temperature calculated by Eq. 1 (main manuscript),  $\sigma_T$ , is given by:

$$\sigma_T = T^2 \sqrt{\left(\frac{\delta T_0}{T_0^2}\right)^2 + \left(\frac{k_B}{\Delta E}\right)^2 \left[ \left(\frac{\delta\Delta E}{k_B} \ln\left(\frac{\Delta}{\Delta_0}\right)\right)^2 + \left(\frac{\delta\Delta}{\Delta}\right)^2 + \left(\frac{\delta\Delta_0}{\Delta_0}\right)^2 \right]}. \quad (\text{S7})$$

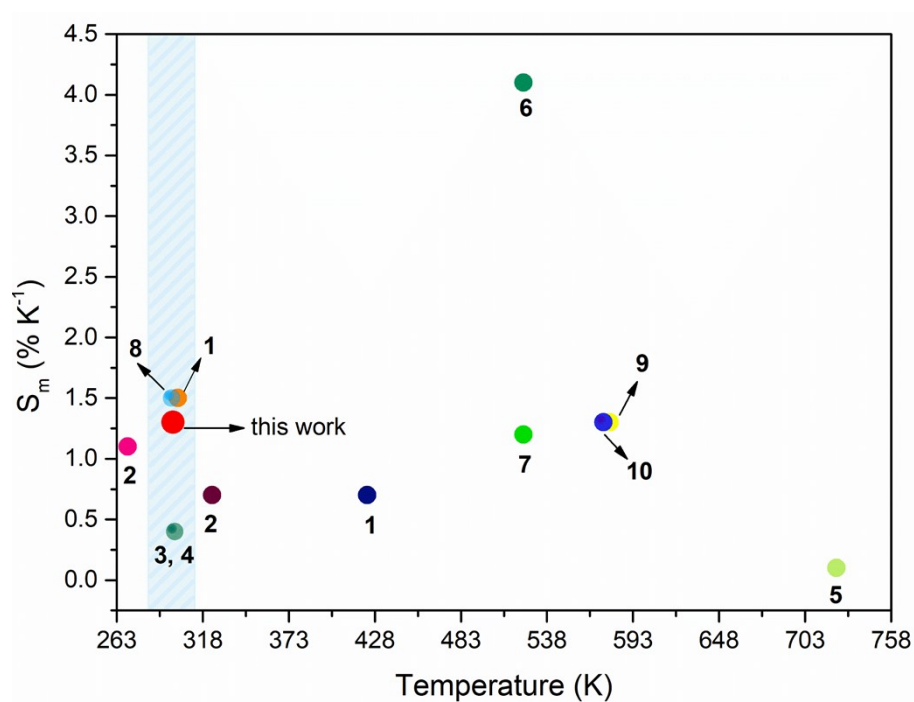

**Figure S4.** Temperature dependence of the maximum relative thermal sensitivity ( $S_m$ ) of some  $\text{Gd}_2\text{O}_3:\text{Yb}^{3+}$ ,  $\text{Er}^{3+}$  reported in the literature, Table S2. The blue area represents the physiological temperature range.

**Table S2.** Comparison of temperature sensing parameters, operating range ( $\Delta T$ ), laser power ( $P$ ) or laser power density ( $P_D$ ), maximum relative sensitivity ( $S_m$ ), corresponding maximum temperature ( $T_m$ ), and temperature uncertainty ( $\delta T$ ), of  $\text{Gd}_2\text{O}_3$ :  $\text{Yb}^{3+}$ ,  $\text{Er}^{3+}$  samples under excitation at or near 980 nm. The thermometric performance was determined by the fluorescence intensity ratio (FIR) methodology.

| Phosphor                                                                                                                        | $\Delta T$<br>(K) | $P$<br>( $10^{-3}$ W) | $P_D$<br>( $\text{W}\cdot\text{cm}^{-2}$ ) | $S_m$<br>(% $\text{K}^{-1}$ ) | $T_m$<br>(K) | $\delta T$<br>(K) | Ref.      |
|---------------------------------------------------------------------------------------------------------------------------------|-------------------|-----------------------|--------------------------------------------|-------------------------------|--------------|-------------------|-----------|
| $(\text{Gd}_{0.89}\text{Yb}_{0.10}\text{Er}_{0.01})_2\text{O}_3$ (1)                                                            | 299–363           |                       | 16                                         | 1.3                           | 299          | 0.1               | This work |
| $\text{Gd}_2\text{O}_3$ :(3%) $\text{Yb}^{3+}$ /(2%) $\text{Er}^{3+}$ -AuNPs-1.25%                                              | 301–615           |                       | 32–600                                     | 1.5                           | 302          | 1.0               | 1         |
| $\text{Gd}_2\text{O}_3$ :(3%) $\text{Yb}^{3+}$ /(2%) $\text{Er}^{3+}$ -AuNPs-2.50%                                              | 423–1050          |                       | 95–455                                     | 0.7                           | 423          | 2.0               | 1         |
| $\text{Gd}_2\text{O}_3$ :(2%) $\text{Yb}^{3+}$ /(1%) $\text{Er}^{3+}$                                                           | 270–357           |                       | 42–488                                     | 1.1                           | 270          |                   | 2         |
| $\text{Gd}_2\text{O}_3$ :(10%) $\text{Yb}^{3+}$ /(1%) $\text{Er}^{3+}$                                                          | 324–612           |                       | 42–488                                     | 0.7                           | 324          |                   | 2         |
| $(100-x-y)\text{Gd}_2\text{O}_3$ :x% $\text{Yb}_2\text{O}_3$ +y% $\text{Er}_2\text{O}_3$ ,<br>x: 0.0-0.6% and y: 0.0-3.5%       | 300–900           | 0-28                  |                                            | 0.4                           | 300          |                   | 3         |
| $(100-x-y)\text{Gd}_2\text{O}_3$ +x $\text{Yb}_2\text{O}_3$ +y $\text{Er}_2\text{O}_3$ ,<br>x: 0.0 to 0.6 % and y: 0.0 to 3.5 % | 300–900           | 2–6                   |                                            | 0.4                           | 300          |                   | 4         |
| $\text{Gd}_2\text{O}_3$ :(5 %) $\text{Yb}^{3+}$ / (2 %) $\text{Er}^{3+}$                                                        | 298–723           |                       | 1–4                                        | 0.1                           | 723          |                   | 5         |
| $\text{Gd}_2\text{O}_3$ :(1%) $\text{Yb}^{3+}$ /(1%) $\text{Er}^{3+}$                                                           | 303–523           | 165 358*              |                                            | 4.1                           | 523          |                   | 6         |
| $\text{Gd}_2\text{O}_3$ :(4%) $\text{Yb}^{3+}$ /(1%) $\text{Er}^{3+}$                                                           | 300–523           |                       | 0.8                                        | 1.2                           | 523          | 2.7               | 7         |
| $\text{Gd}_2\text{O}_3$ :(6%) $\text{Yb}^{3+}$ /(1%) $\text{Er}^{3+}$                                                           | 324–612           |                       | 0.8                                        | 1.2                           | 523          | 3.3               | 7         |
| $\text{Gd}_2\text{O}_3$ :(10%) $\text{Yb}^{3+}$ /(1%) $\text{Er}^{3+}$                                                          | 298–578           | 10                    |                                            | 1.5                           | 298          |                   | 8         |
| $\text{Gd}_2\text{O}_3$ :(10%) $\text{Yb}^{3+}$ /(1%) $\text{Er}^{3+}$                                                          | 298–578           |                       | 2.8                                        | 1.3                           | 578          |                   | 9         |
| $\text{Gd}_2\text{O}_3$ :(7.0%) $\text{Yb}^{3+}$ /(3.5%) $\text{Er}^{3+}$                                                       | 300–575           | 3.0-7.0               |                                            | 1.3                           | 574          |                   | 10        |

\*Co-excitation wavelength at 980 nm and 1550 nm.

## 4. White-light emission

### 4.1. Excitation wavelength

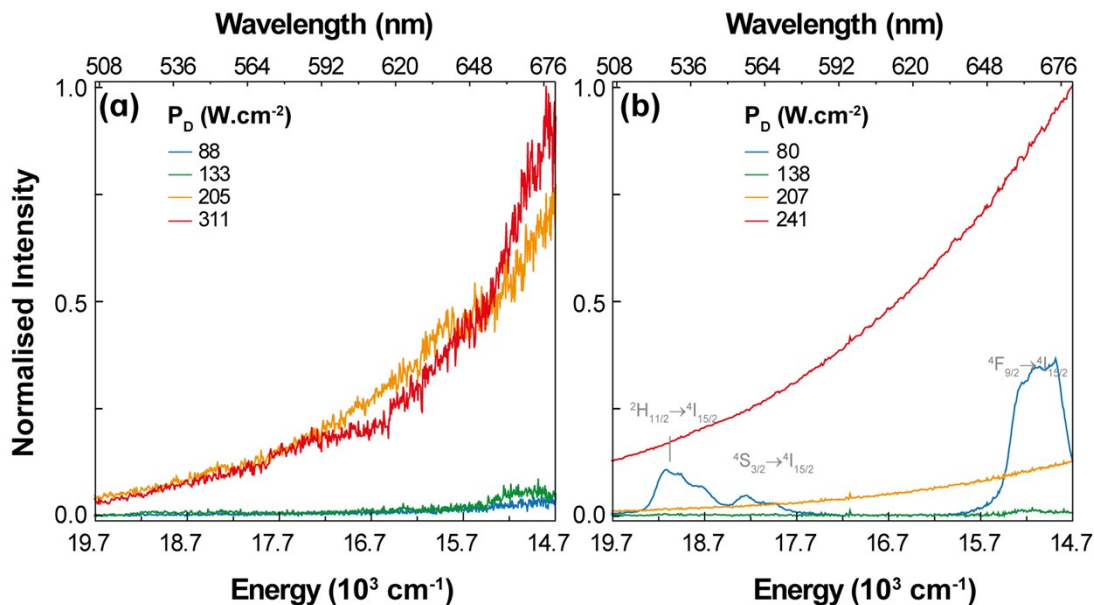

**Figure S5.** Upconversion emission spectra of **1**, in pellet and at ambient conditions, excited at (a) 808 nm and (b) 980 nm.

The emission spectra upon excitation at 980 nm and at 808 nm were obtained under different circumstances (days apart, different slits, and different acquisition times) and they cannot be directly compared. However, it can be inferred that the excitation at 980 nm leads to brighter white light emission compared to excitation at 808 nm with approximately the same excitation power density, because the signal-to-noise ratios are much higher for the spectra excited at 980 nm than at 808 nm, for which larger slits and longer acquisition times were employed. These observations are explained by the higher concentration of  $\text{Yb}^{3+}$  (10%) and its larger absorption cross section at 980 nm compared to the lower concentration of  $\text{Er}^{3+}$  (1%) and its smaller cross section at 808 nm in the sample,  $(\text{Gd}_{0.89}\text{Yb}_{0.1}\text{Er}_{0.01})_2\text{O}_3$ .

## 4.2. Pump power dependence and powder versus pellets

**Table S3.** Slopes of the dependence of the integrated intensity of white light emission,  $I_{\text{WL}}$ , with  $P_{\text{D}}$  (in a log-log plot) of **1** and **2** in powder and pellets at different pressures and room temperature.

| Sample   |        | Slope         | $r^2$ | $p$ (bar)                                |
|----------|--------|---------------|-------|------------------------------------------|
| <b>1</b> | powder | $3.9 \pm 0.2$ | 0.986 | ambient pressure                         |
| <b>2</b> |        | $3.8 \pm 0.5$ | 0.955 |                                          |
| <b>1</b> | pellet | $6.1 \pm 0.6$ | 0.966 | $7 \times 10^{-5}$<br>$2 \times 10^{-5}$ |
|          |        | $7.2 \pm 0.5$ | 0.974 |                                          |
|          |        | $4.2 \pm 0.4$ | 0.970 |                                          |

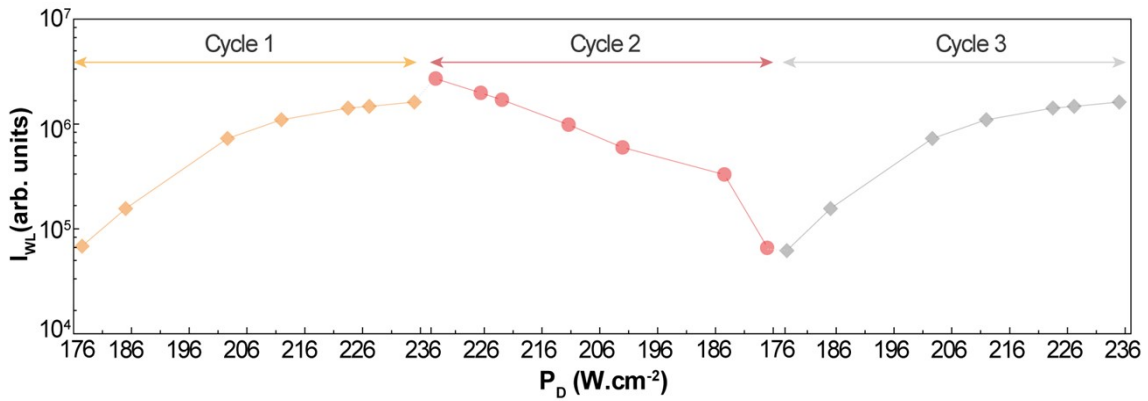

**Figure S6.**  $P_{\text{D}}$  dependence of the integrated intensity of the white light emission ( $I_{\text{WL}}$ ) of **2** (powder) recorded in three cycles of irradiation. In cycles **1** (forward) and **2** (reverse), the powder was irradiated at the same spot, whereas in cycle 3 the measurement was performed on several points of the sample.

### 4.3. Pressure dependence

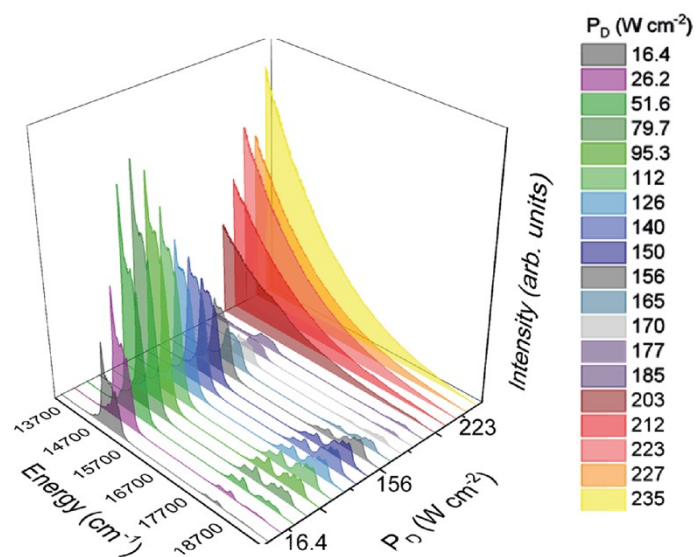

**Figure S7.** Emission spectra of **1** in pellet obtained at ambient conditions as a function of  $P_D$ .

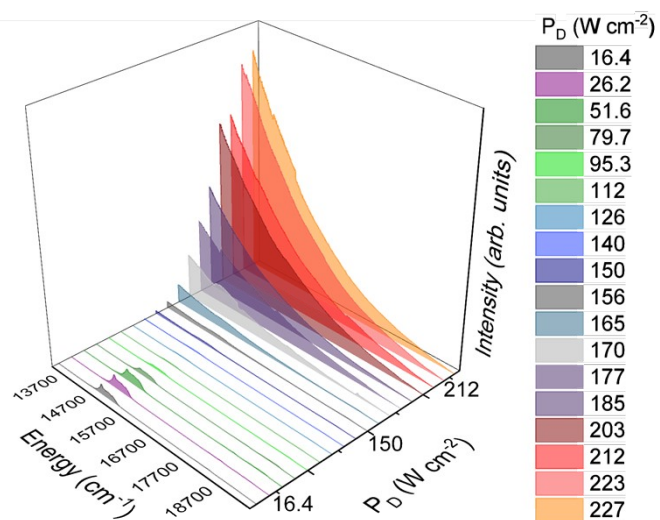

**Figure S8.** Emission spectra of **1** in pellets and at  $7 \times 10^{-5}$  bar as a function of  $P_D$ .

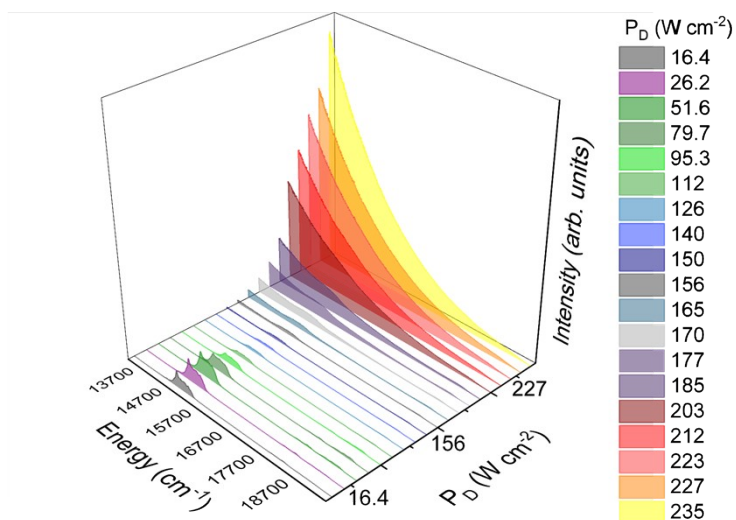

**Figure S9.** Emission spectra of **1** in pellets and at  $2 \times 10^{-5}$  bar as a function of  $P_D$ .

#### 4.4. Temperature determination from Planck's Law

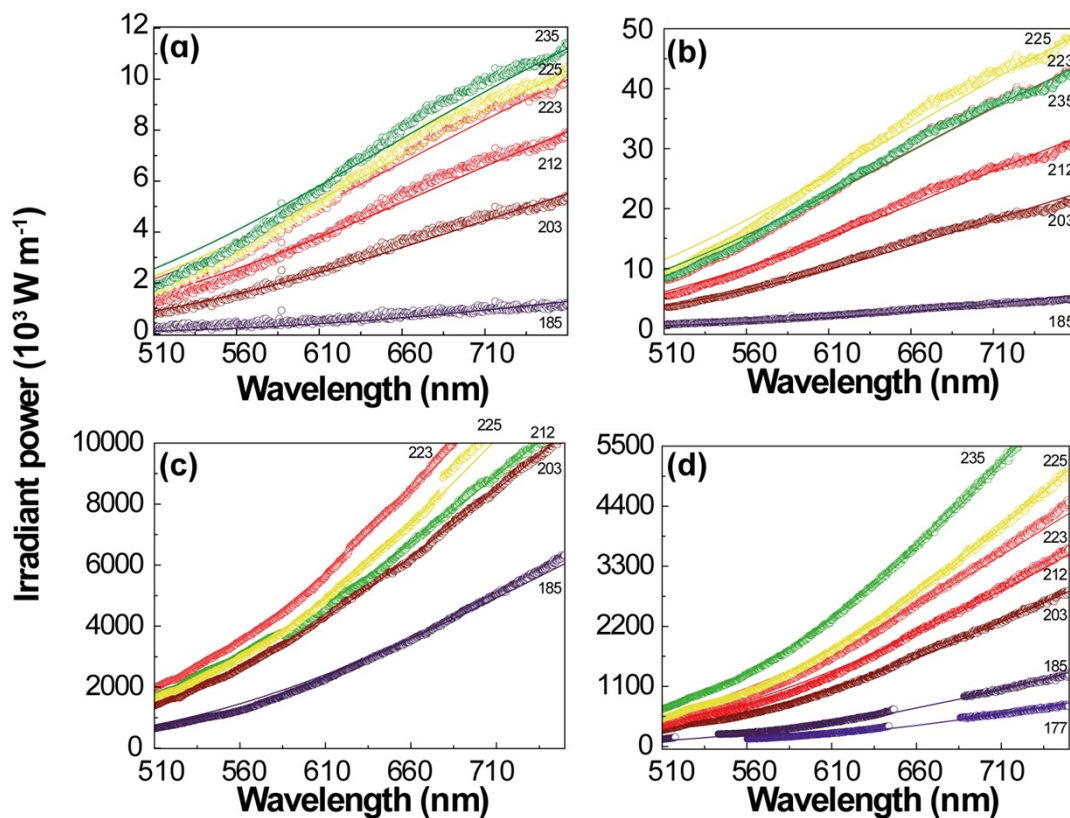

**Figure S10.** Fitting of the emission spectra acquired at different values of  $P_D$  for (a) **2** in powder at ambient pressure, (b) **1** in powder at ambient pressure, (c) **1** in pellet at  $7 \times 10^{-5}$  bar, and (d) **1** in pellet at  $2 \times 10^{-5}$  bar using Planck's law.

**Table S4.** Fitting results of the continuous upconversion emission spectra (Figure 5c in the main manuscript) to Eq. (2) with  $A = 4.20 \times 10^{-21}$  and  $T = 0.014388/B$  for **1** (pellet) under 980 nm excitation at ambient pressure. The fitted temperatures are represented in Fig. 5d in the main manuscript.

| $P_D$ (W·cm <sup>-2</sup> ) | $B$ ( $\times 10^{-6}$ ) | $\Delta B$ ( $\times 10^{-9}$ ) | $R^2$ | $T$ (K)          |
|-----------------------------|--------------------------|---------------------------------|-------|------------------|
| 177                         | 7.54                     | 1.57                            | 0.989 | 1907.8 $\pm$ 0.4 |
| 185                         | 7.15                     | 8.98                            | 0.997 | 2013.4 $\pm$ 0.3 |
| 203                         | 6.59                     | 0.566                           | 0.998 | 2183.1 $\pm$ 0.2 |
| 212                         | 6.43                     | 0.902                           | 0.995 | 2237.1 $\pm$ 0.3 |
| 223                         | 6.29                     | 1.18                            | 0.990 | 2288.9 $\pm$ 0.4 |
| 225                         | 6.22                     | 1.68                            | 0.981 | 2315.0 $\pm$ 0.6 |
| 235                         | 6.04                     | 2.01                            | 0.973 | 2382.5 $\pm$ 0.8 |

**Table S5.** Same as Table S4 for **2** (powder) at ambient pressure (Figure S10a) and  $A = 3.72 \times 10^{-24}$ . The fitted temperatures are represented in Fig. 5d in the main manuscript.

| $P_D$ (W·cm <sup>-2</sup> ) | $B$ ( $\times 10^{-6}$ ) | $\Delta B$ ( $\times 10^{-9}$ ) | $R^2$ | $T$ (K)      |
|-----------------------------|--------------------------|---------------------------------|-------|--------------|
| 185                         | 7.06                     | 5.47                            | 0.822 | 2037 $\pm$ 2 |
| 203                         | 5.97                     | 1.39                            | 0.989 | 2411 $\pm$ 1 |
| 212                         | 5.69                     | 1.41                            | 0.988 | 2528 $\pm$ 1 |
| 223                         | 5.52                     | 1.61                            | 0.984 | 2607 $\pm$ 1 |
| 225                         | 5.49                     | 1.66                            | 0.983 | 2619 $\pm$ 1 |
| 235                         | 5.43                     | 1.72                            | 0.982 | 2648 $\pm$ 1 |

**Table S6.** Same as Table S4 for **1** (powder) at ambient pressure (Figure S10b) and  $A = 1.51 \times 10^{-23}$ . The fitted temperatures are represented in Fig. 5d in the main manuscript.

| $P_D$ (W·cm <sup>-2</sup> ) | $B$ ( $\times 10^{-6}$ ) | $\Delta B$ ( $\times 10^{-9}$ ) | $R^2$ | $T$ (K)          |
|-----------------------------|--------------------------|---------------------------------|-------|------------------|
| 185                         | 6.48                     | 1.17                            | 0.951 | 2053.7 $\pm$ 0.9 |
| 203                         | 7.01                     | 3.21                            | 0.990 | 2412.9 $\pm$ 0.5 |
| 212                         | 5.96                     | 1.30                            | 0.991 | 2523.3 $\pm$ 0.5 |
| 223                         | 5.70                     | 1.23                            | 0.987 | 2631.4 $\pm$ 0.7 |
| 225                         | 5.47                     | 1.42                            | 0.985 | 2673.5 $\pm$ 0.8 |

**Table S7.** Same as Table S4 for **1** (pellet) at  $7 \times 10^{-5}$  bar (Figure S10c) and  $A = 7.08 \times 10^{-21}$ . The fitted temperatures are represented in Fig. 5d in the main manuscript.

| $P_D$ (W·cm <sup>-2</sup> ) | $B$ ( $\times 10^{-6}$ ) | $\Delta B$ ( $\times 10^{-9}$ ) | $R^2$ | $T$ (K)          |
|-----------------------------|--------------------------|---------------------------------|-------|------------------|
| 185                         | 6.75                     | 1.41                            | 0.999 | 2130.6 $\pm$ 0.4 |
| 203                         | 6.17                     | 1.13                            | 0.688 | 2332.2 $\pm$ 0.4 |
| 212                         | 5.96                     | 0.48                            | 0.998 | 2413.3 $\pm$ 0.2 |
| 223                         | 5.81                     | 1.35                            | 0.985 | 2477.5 $\pm$ 0.6 |

**Table S8.** Same as Table S4 for **1** (pellet) at  $2 \times 10^{-5}$  bar (Figure S10d) and  $A = 4.42 \times 10^{-21}$ . The fitted temperatures are represented in Fig. 5d in the main manuscript.

| $P_D$ (W·cm <sup>-2</sup> ) | $B$ ( $\times 10^{-6}$ ) | $\Delta B$ ( $\times 10^{-9}$ ) | $R^2$ | $T$ (K)          |
|-----------------------------|--------------------------|---------------------------------|-------|------------------|
| 177                         | 7.54                     | 1.57                            | 0.989 | 1907.8 $\pm$ 0.4 |
| 185                         | 7.15                     | 8.98                            | 0.997 | 2013.4 $\pm$ 0.3 |
| 203                         | 6.59                     | 0.566                           | 0.998 | 2183.1 $\pm$ 0.2 |
| 212                         | 6.43                     | 0.902                           | 0.995 | 2237.1 $\pm$ 0.3 |
| 223                         | 6.29                     | 1.18                            | 0.990 | 2288.9 $\pm$ 0.4 |
| 225                         | 6.22                     | 1.68                            | 0.981 | 2315.0 $\pm$ 0.6 |
| 235                         | 6.04                     | 2.01                            | 0.973 | 2382.5 $\pm$ 0.8 |

**Table S9.** Slopes of the dependence of the calculated temperature, Eq. (2), with  $P_D$  of **1** and **2** in powder and pellets at different pressures, represented in Fig. 5d in the manuscript.

| Sample | Slope      | $r^2$ | $p$ (bar)          |
|--------|------------|-------|--------------------|
| 1      | 10 $\pm$ 1 | 0.860 | ambient pressure   |
| 2      | 13 $\pm$ 1 | 0.971 |                    |
|        | 6 $\pm$ 1  | 0.940 |                    |
| 1      | 9 $\pm$ 1  | 0.966 | $7 \times 10^{-5}$ |
|        | 8 $\pm$ 1  | 0.949 | $2 \times 10^{-5}$ |

## 5. Estimating the thermal conductivity

The effective thermal conductivity,  $\langle k \rangle$ , of a porous material can be approximated as<sup>11</sup>

$$\frac{\langle k \rangle}{k_f} = \left( \frac{k_s}{k_f} \right)^{0.28 - 0.757 \log \langle \varepsilon \rangle - 0.057 \log (k_s/k_f)}$$

where  $\langle \varepsilon \rangle$  is the effective porosity,  $k_s$  is the thermal conductivity of the solid, and  $k_f$  is the thermal conductivity of the fluid. Thus,  $\langle k \rangle$  decreases with increasing porosity  $\langle \varepsilon \rangle$ .

For  $\text{Gd}_2\text{O}_3$ , the thermal conductivity at room temperature was determined as being 1.72 to  $3.15 \text{ W m}^{-1} \text{ K}^{-1}$ , depending on the time and the temperature of sintering,<sup>12</sup> as  $4.3 \text{ W m}^{-1} \text{ K}^{-1}$  for monoclinic  $\text{Gd}_2\text{O}_3$  ceramics,<sup>13</sup> and as  $3.2 \pm 0.5 \text{ W m}^{-1} \text{ K}^{-1}$  for microwave sintered (at  $1500^\circ\text{C}$ ).<sup>14</sup>

At room temperature, considering  $k_s \cong 2.6 \text{ W m}^{-1} \text{ K}^{-1}$  for  $\text{Gd}_2\text{O}_3$ , and  $k_f \cong 0.026 \text{ W m}^{-1} \text{ K}^{-1}$  for air, the effective thermal conductivity becomes,

$$\langle k \rangle = 0.026 \times 100^{(0.166 - 0.757 \log \langle \varepsilon \rangle)}$$

which for  $\langle \varepsilon \rangle = 0.4$  gives  $\langle k \rangle = 0.22 \text{ W m}^{-1} \text{ K}^{-1}$  and for  $\langle \varepsilon \rangle = 0.8$  gives  $\langle k \rangle = 0.078 \text{ W m}^{-1} \text{ K}^{-1}$ . These values of the effective porosity represent consolidated (e.g., compact pellets) and unconsolidated nanopowders of similar material.<sup>11, 15, 16</sup>

The thermal conductivity of gases,  $k_p$ , at very low pressures (for Knudsen number larger than 1), can be approximated as<sup>17</sup>

$$\frac{k_p}{k_0} = \frac{1}{1 + C\bar{T}/pd}$$

where  $k_0$  is the thermal conductivity of the gas at room pressure and temperature,  $C$  is a constant, which for air is  $7.6 \times 10^{-5} \text{ N m}^{-1} \text{ K}^{-1}$ ,  $p$  (in Pa) is the pressure,  $d$  (in m) is the distance between the plates (or the distance between the two regions defining the temperature gradient), and  $\bar{T}$  (in K) the average temperature of the plates (or the average temperature of the regions responsible for the temperature gradient).

For an average temperature of  $\bar{T} \cong (1700 + 300)/2 = 1000 \text{ K}$ , and  $d = 0.76 \text{ mm}$ , then

$$\frac{k_p}{k_0} \cong \frac{1}{1 + 100/p}$$

which gives a value of  $k_p/k_0 = 0.0196$  for  $p = 2 \text{ Pa} = 2 \times 10^{-5} \text{ bar}$ . Or, the thermal conductivity of air decreases ca. 50-fold from 1 bar to 2 Pa.

## 6. Experimental procedure to temporal analysis

The data acquisition procedure for the temporal analysis is the following:

- 1) Set laser (980 nm, ca.  $102.6 \text{ W}\cdot\text{cm}^{-2}$ ) and wait 30 minutes for stabilization (shutter closed).
- 2) Set parameters for spectral acquisition.
- 3) Start measurement.
- 4) Open the laser shutter at  $t = 15 \text{ s}$ .
- 5) Close the laser shutter at  $t = 75 \text{ s}$ .
- 6) End of measurement at  $t = 105 \text{ s}$ .
- 7) Save data and check the transient curve.
- 8) Optimize parameters if needed.
- 9) Repeat steps 3-7 (4 times).

## 7. References

1. Debasu, M. L.; Ananias, D.; Pastoriza-Santos, I.; Liz-Marzán, L. M.; Rocha, J.; Carlos, L. D. All-in-One Optical Heater-Thermometer Nanoplatfrom Operative from 300 to 2000 K Based on  $\text{Er}^{3+}$  Emission and Blackbody Radiation. *Adv. Mater.* **2013**, 25 (35), 4868-4874.
2. Lei, Y.; Song, H.; Yang, L.; Yu, L.; Liu, Z.; Pan, G.; Bai, X.; Fan, L. Upconversion Luminescence, Intensity Saturation Effect, and Thermal Effect in  $\text{Gd}_2\text{O}_3$ :  $\text{Er}^{3+}$ ,  $\text{Yb}^{3+}$  Nanowires. *J. Chem. Phys.* **2005**, 123 (17), 174710-174715.
3. Singh, S. K.; Kumar, K.; Rai, S. B.  $\text{Er}^{3+}/\text{Yb}^{3+}$  Codoped  $\text{Gd}_2\text{O}_3$  Nano-Phosphor for Optical Thermometry. *Sens. Actuators A: Phys.* **2009**, 149 (1), 16-20.
4. Singh, S. K.; Kumar, K.; Rai, S. B. Multifunctional  $\text{Er}^{3+}$ - $\text{Yb}^{3+}$  Codoped  $\text{Gd}_2\text{O}_3$  Nanocrystalline Phosphor Synthesized through Optimized Combustion Route. *Appl. Phys. B-Lasers O* **2009**, 94 (1), 165-173.
5. Tian, Y.; Tian, B. N.; Cui, C. E.; Huang, P.; Wang, L.; Chen, B. J. Size-Dependent Upconversion Luminescence and Temperature Sensing Behavior of Spherical  $\text{Gd}_2\text{O}_3$ : $\text{Yb}^{3+}/\text{Er}^{3+}$  Phosphor. *RSC Adv.* **2015**, 5 (19), 14123-14128.
6. Hao, H. Y.; Zhang, X. R.; Wang, Y. X.; Liang, L. Color Modulation and Temperature Sensing Investigation of  $\text{Gd}_2\text{O}_3$ : 1 Mol%  $\text{Er}^{3+}$ , 1 Mol%  $\text{Yb}^{3+}$  Phosphors under Different Excitation Condition. *J. Lumin.* **2019**, 215, 116556.
7. Hao, H. Y.; Zhang, X. R.; Wang, Y. X.; Li, L. Up-Conversion Luminescence of  $\text{Yb}^{3+}/\text{Er}^{3+}$  Doped  $\text{Gd}_2\text{O}_3$  Phosphors for Optical Temperature Sensing in Green and Red Regions. *Opt. Commun.* **2019**, 452, 387-394.
8. Zheng, W.; Sun, B. Y.; Li, Y. M.; Lei, T. Y.; Wang, R.; Wu, J. Z. Low Power High Purity Red Upconversion Emission and Multiple Temperature Sensing Behaviors in  $\text{Yb}^{3+}$ ,  $\text{Er}^{3+}$  Codoped  $\text{Gd}_2\text{O}_3$  Porous Nanorods. *ACS Sustain. Chem. Eng.* **2020**, 8 (25), 9578-9588.
9. Zheng, W.; Sun, B. Y.; Li, Y. M.; Wang, R.  $\text{Gd}_2\text{O}_3$ : $\text{Er}^{3+}$ ,  $\text{Yb}^{3+}$  Upconversion Nanoparticle-Based Thermometry for Temperature Monitoring. *ACS Appl. Nano Mater.* **2021**, 4 (4), 3922-3931.
10. Li, Z. H.; Han, Q.; Yan, T. P.; Huang, Z. J.; Song, Y. L.; Wang, Y. X.; Zhang, X. R. Up-Conversion Luminescence and Optical Temperature Sensing of  $\text{Er}^{3+}$ ,  $\text{Yb}^{3+}$  Co-Doped  $\text{Gd}_2\text{O}_3$  Phosphors with Different F/ $\text{Ln}^{3+}$ . *J. Alloy. Compd.* **2022**, 904, 164009.
11. M. Kaviani, Principles of Heat Transfer in Porous Media, 2nd ed., Springer, New York, 1995.
12. P.-H. Gao et al. Microstructure and Properties of Densified  $\text{Gd}_2\text{O}_3$  Bulk. *Materials* **2022**, 15, 7793.
13. S. Balabanov et al. Thermal Conductivity of Yttria-Gadolinia Solid Solution Optical Ceramics in the Temperature Range 50–300 K. *Inorganics* **2022**, 10, 78.
14. Q. Mistarihi, F. B. Sweidan, H. J. Ryu, Thermo-physical properties of bulk  $\text{Gd}_2\text{O}_3$  for fuel performance analysis of a lumped burnable absorber fuel design, Transactions of the Korean Nuclear Society Autumn Meeting, Gyeongju, Korea, October 26-27, 2017.
15. S. Redmond, S. C. Rand, X. L. Ruan, M. Kaviani. Multiple scattering and nonlinear thermal emission of  $\text{Yb}^{3+}$ ,  $\text{Er}^{3+}$ : $\text{Y}_2\text{O}_3$  nanopowders. *J. Appl. Phys.*, **2004**, 95, 4069-4077.
16. L. Wang et al. Computer simulation of the packing of nanoparticles. *Powder Technol.* **2022**, 401, 117317.

17. H. Wu, S. Grabarnik, A. Emadi, G. de Graaf, R. F. Wolffenbuttel. Characterization of thermal cross-talk in a MEMS-based thermopile detector array. *J. Micromech. Microeng.* **2009**, *19*, 074022.
